# Supplementary material
Source: Springer Nature journal article supplement (https://www.springermedizin.de/resource/supplementary/12936_2005_158_MOESM5_ESM.pdf/9547018)

3a) Kossodo

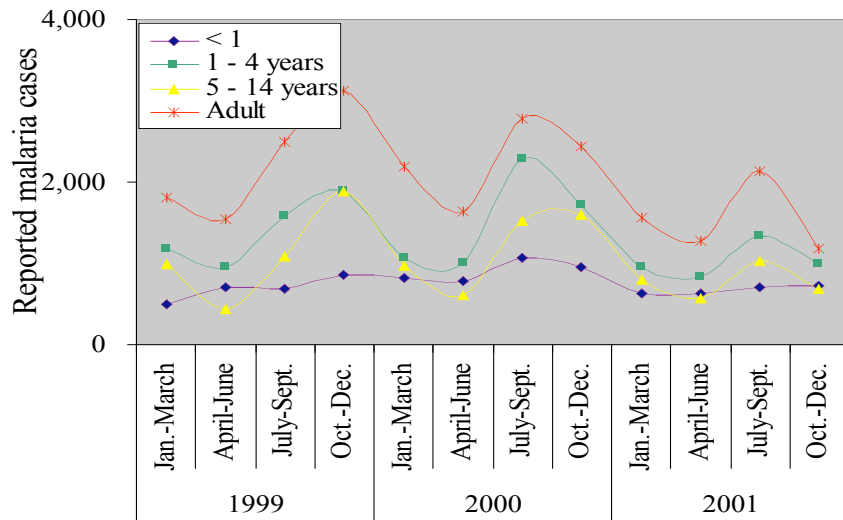

3b) Pissy

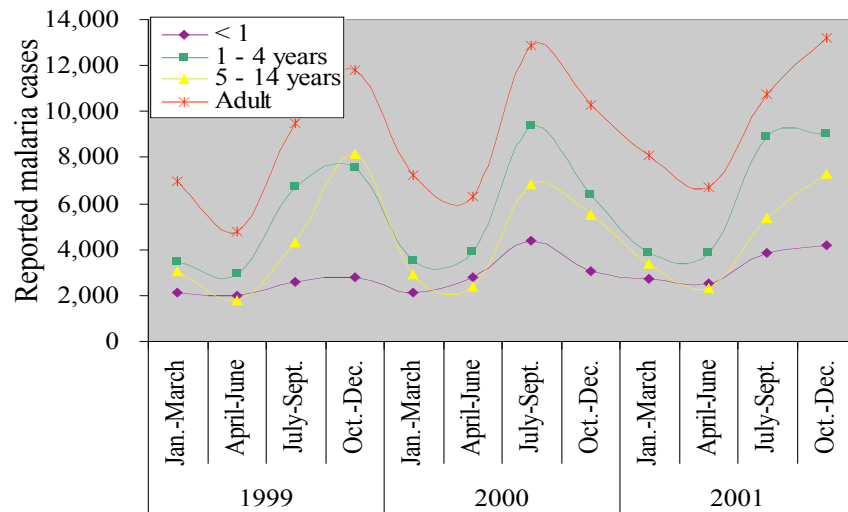

3c) Paul VI

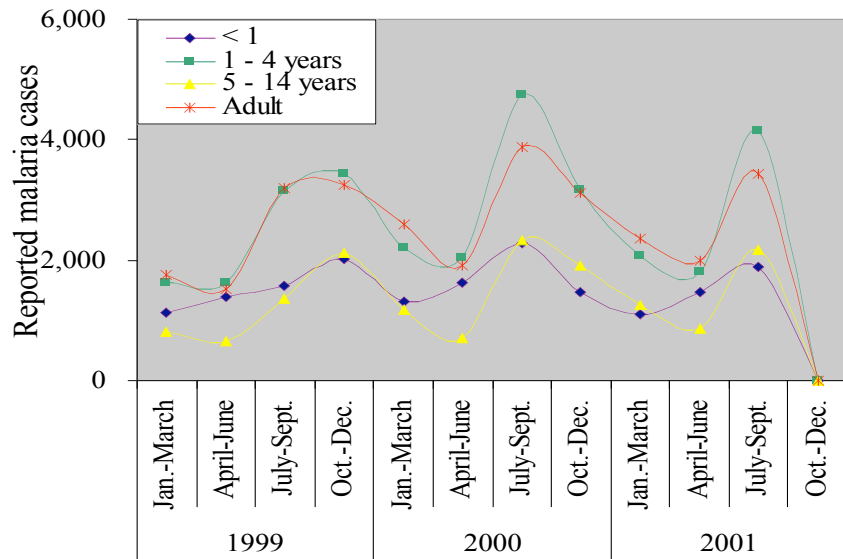

3d) Secteur 30

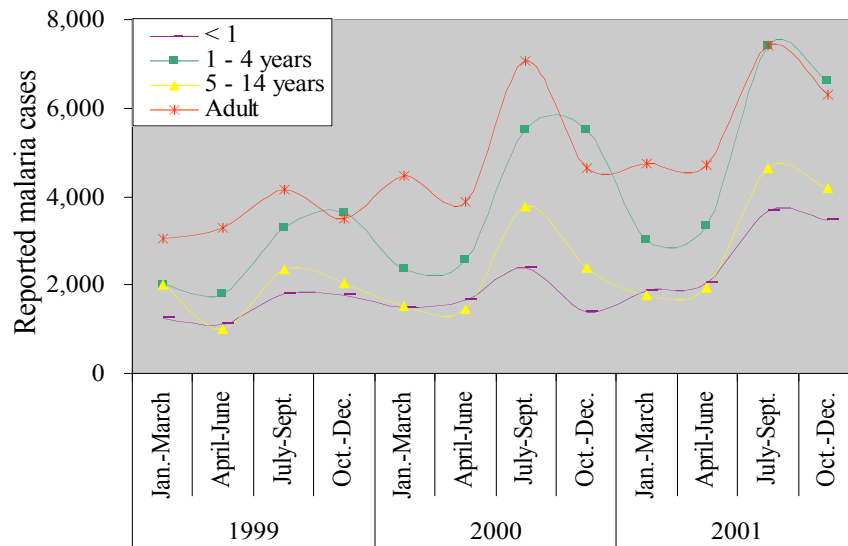

Supplement: MOESM5 [file 9547018]
